# Supplementary material
Source: PubMed Central journal article supplement (PMC2981549)
Supplement: blood-2010-01-261958_1.pdf [file blood-2010-01-261958_1.pdf]

**Matched Sibling Donor group (MSD)**

First HLA-identical sibling tx, age less than 18y, for AML, ALL, CML and MDS (n=5393)

Myeloablative conditioning regimen (n=5182)

BM or PB (n=5124)

Take out T-cell depleted or CD34 selected (n=4766)

Year of tx 1993-2006 (n=2150)

Exclude GVHD prophylaxis other than CNI based (n=2129)

Exclude disease status unknown (n=2099)

Restrict to teams contributing to 1-Ag mismatched related and phenotypic match groups (n=1354)

Bone Marrow cases only (n=1208)

**One-antigen mismatched and phenotypically matched related group (mmRD)**

First tx, age less than 18y, for AML, ALL, CML and MDS with donor who is either a One-Ag mismatch or phenotypic matched relative (n=363)

Myeloablative conditioning regimen (n=335)

BM or PB (n=332)

Take out T-cell depleted or CD34 selected cases (n=273)

Year of tx 1993-2006 (n=256)

Exclude GVHD prophylaxis other than CNI based (n=255)

Exclude disease status unknown (n=253)

HLA match verified by HLA lab reports (n=196)

Keep BM cases only (n=151)

**8/8 matched unrelated donor group (URD)**

First tx, age less than 18y, for AML, ALL, CML and MDS with unrelated donor (n=3094)

Myeloablative conditioning regimen (n=2921)

BM or PB (n=2627)

Take out T-cell depleted or CD34 selected (n=1804)

Year of tx from 1993-2006 (n=1653)

Restrict to 8/8 matched at A, B, C, and DRB1 from NMDP high resolution retrospective typing program (n=364)

CAP modeling (n=331)\*

Exclude GVHD prophylaxis other than CNI based (n=326)

Exclude disease status unknown (n=324)

Keep BM cases only (n=266)

\* CAP modeling – as described in study population in Methods
